# Supplementary material for: Towards a greener synthesis of dianhydrohexitol esters
Source: Royal Society of Chemistry journal article supplement (doi:10.1039/d3gc01795h), 2023-01-01
Supplement: d3gc01795h1.pdf [file d3gc01795h1.pdf]

## ELECTRONIC SUPPLEMENTARY INFORMATION

### Towards a greener synthesis of dianhydrohexitol esters

Katrin Städtke<sup>1</sup>, Andreas W. Göpfert<sup>2</sup>, Alexandra Inayat<sup>2</sup>

<sup>1</sup> Erlangen Center for Interface Research and Catalysis, Friedrich-Alexander-Universität Erlangen-Nürnberg, Egerlandstrasse 3, 91058 Erlangen, Germany

<sup>2</sup> Institute of Chemical Reaction Engineering, Friedrich-Alexander-Universität Erlangen-Nürnberg, Egerlandstrasse 3, 91058 Erlangen, Germany

| <u>Table of Contents</u>                                                                                                                                                                                                                                       | Page |
|----------------------------------------------------------------------------------------------------------------------------------------------------------------------------------------------------------------------------------------------------------------|------|
| Fig. S1 Dean-Stark apparatus for the esterification using Route 1                                                                                                                                                                                              | 2    |
| Fig. S2 Mass spectra of isosorbide (A) and isomannide (B)                                                                                                                                                                                                      | 2    |
| Fig. S3 Mass spectra of isomannide monoester 2-propionyl isomannide (right) and diester 2,5-dipropionyl isomannide (left)                                                                                                                                      | 2    |
| Fig. S4 Mass spectra of isosorbide monoesters 2-propionyl isosorbide (left) and 5-propionyl isosorbide (right)                                                                                                                                                 | 3    |
| Fig. S5 Mass spectra of isosorbide diesters 2,5-dipropionyl isosorbide (left) and byproduct 5-propionyl-2-sulfon isosorbide (right)                                                                                                                            | 3    |
| Fig. S6 <sup>1</sup> H NMR spectra of isosorbide (starting material), 2,5-diacetyl isosorbide, 2,5-dipropionyl isosorbide and 2,5-dibutyryl isosorbide                                                                                                         | 3    |
| Fig. S7 <sup>1</sup> H NMR spectra of isomannide, 2,5-diacetyl isomannide and 2,5-dipropylisomannide                                                                                                                                                           | 4    |
| Fig. S8 Reaction progress for the esterification of isosorbide with butyric acid: gas chromatograms of esterification with entrainer n-propyl acetate, mass spectra of the new peak 'a' at retention time 4.4 min indicating butyric acid propyl ester (right) | 4    |
| Fig. S9 Gas chromatograms of the purified dianhydrohexitol esters                                                                                                                                                                                              | 4    |
| Tab. S1 Elementary or process flows of the chemicals and energy quantities for the production of 1t DAIS                                                                                                                                                       | 5    |
| References                                                                                                                                                                                                                                                     | 6    |

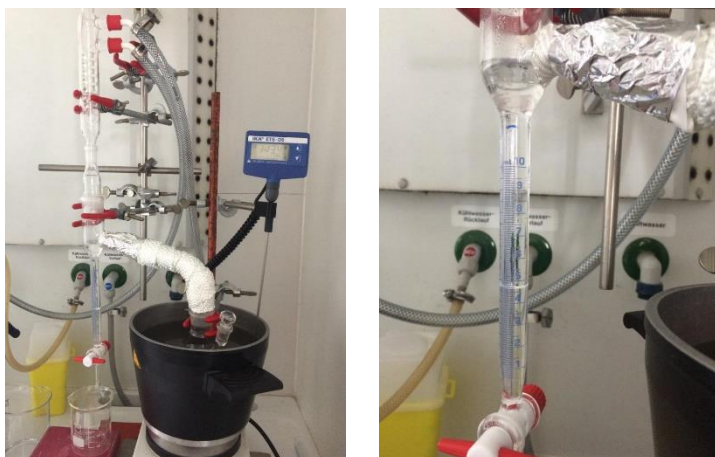

Fig. S1 Dean-Stark apparatus for the esterification using Route 1

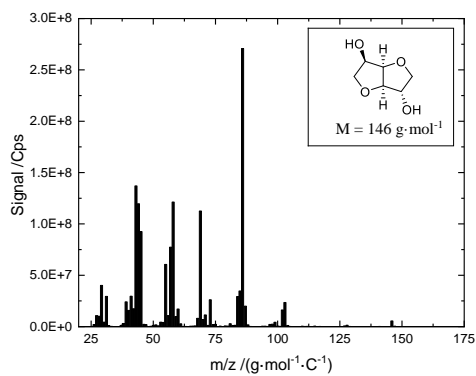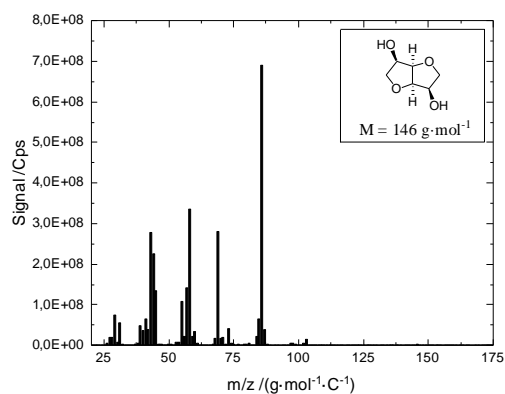

Fig. S2 Mass spectra of isosorbide (left) and isomannide (right)

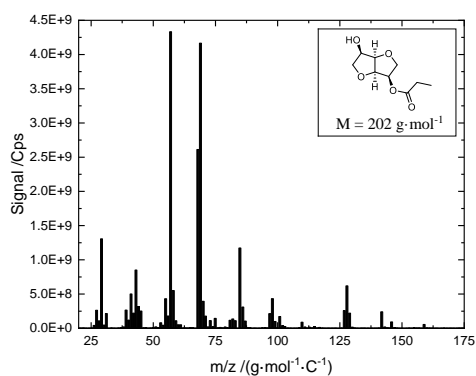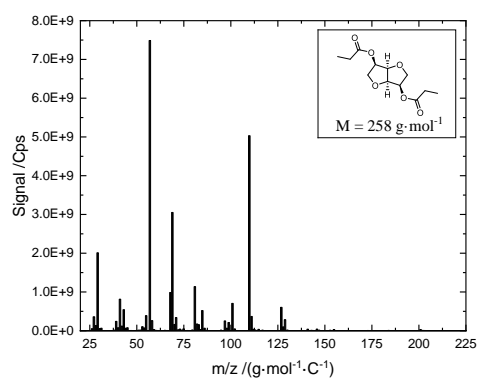

Fig. S3 Mass spectra of isomannide monoester 2-propionyl isomannide (left) and diester 2,5-dipropionyl isomannide (right); there were no further peaks beyond 175 and 225  $\text{g}\cdot\text{mol}^{-1}\cdot\text{C}^{-1}$

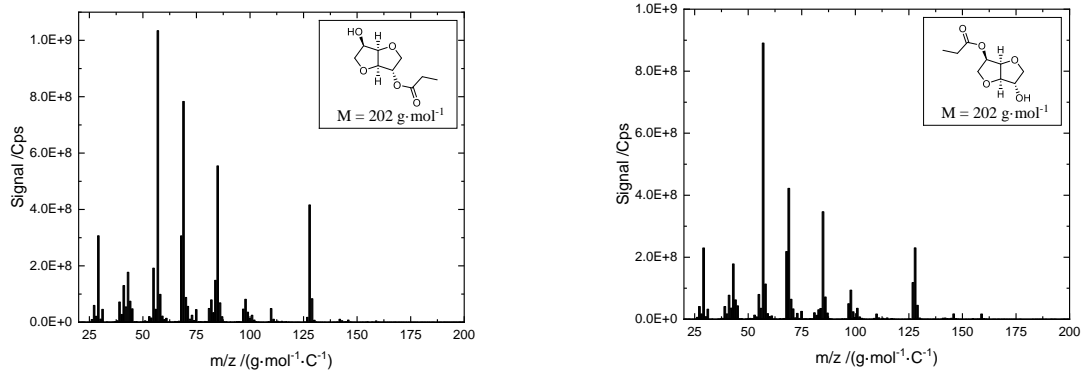

**Fig. S4** Mass spectra of isosorbide monoesters 2-propionyl isosorbide (left) and 5-propionyl isosorbide (right); there were no further peaks beyond 200  $\text{g}\cdot\text{mol}^{-1}\cdot\text{C}^{-1}$

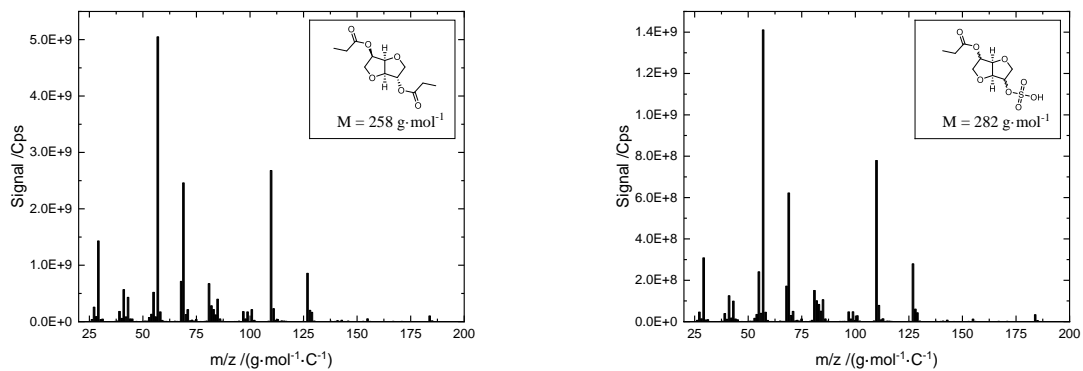

**Fig. S5** Mass spectra of isosorbide diester 2,5-dipropionyl isosorbide (left) and byproduct 5-propionyl-2-sulfon isosorbide (right); there were no further peaks beyond 200  $\text{g}\cdot\text{mol}^{-1}\cdot\text{C}^{-1}$

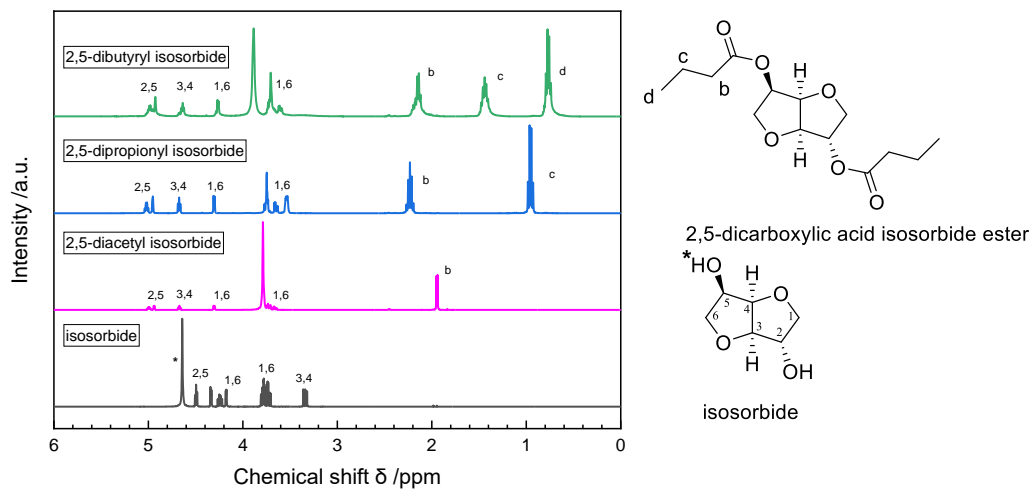

**Fig. S6**  $^1\text{H}$  NMR spectra of isosorbide (educt), 2,5-diacetyl isosorbide, 2,5-dipropionyl isosorbide and 2,5-dibutyl isosorbide

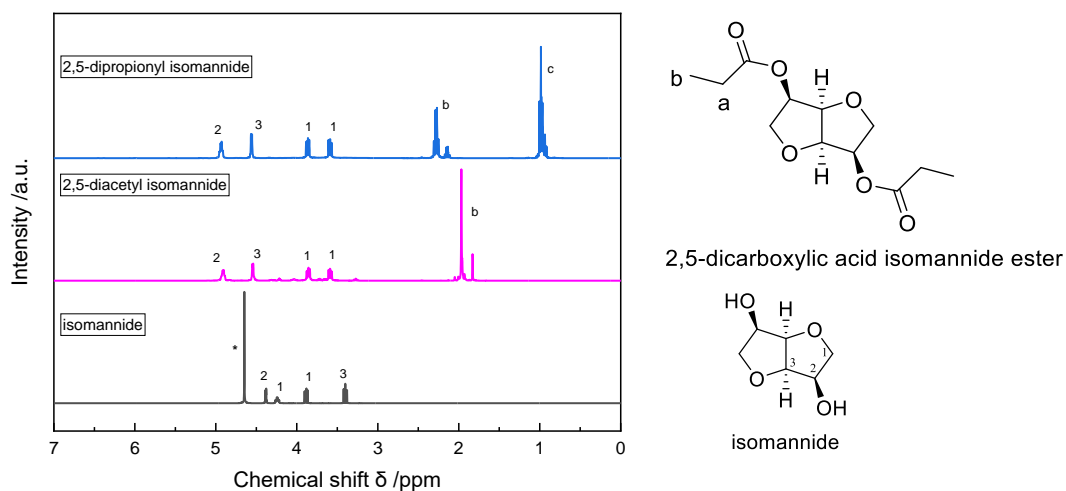

Fig. S7  $^1\text{H}$  NMR spectra of isomannide, 2,5-diacetyl isomannide and 2,5-dipropionyl isomannide

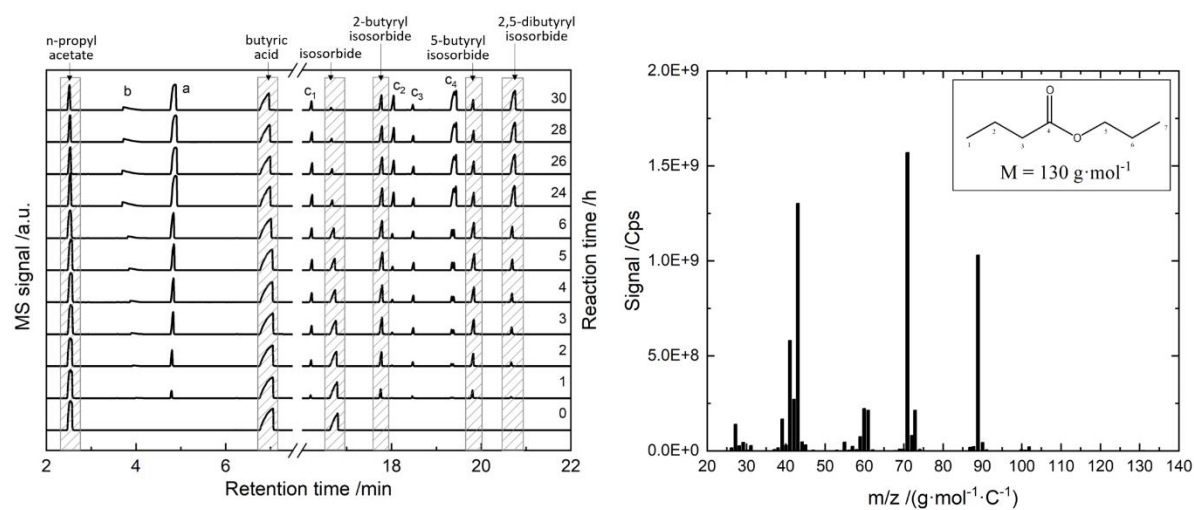

Fig. S8 Reaction progress for the esterification of isoribide with butyric acid: gas chromatograms of esterification of isoribide with entrainer n-propyl acetate, mass spectra of the new peak 'a' at retention time 4.4 min indicating butyric acid propyl ester (right)

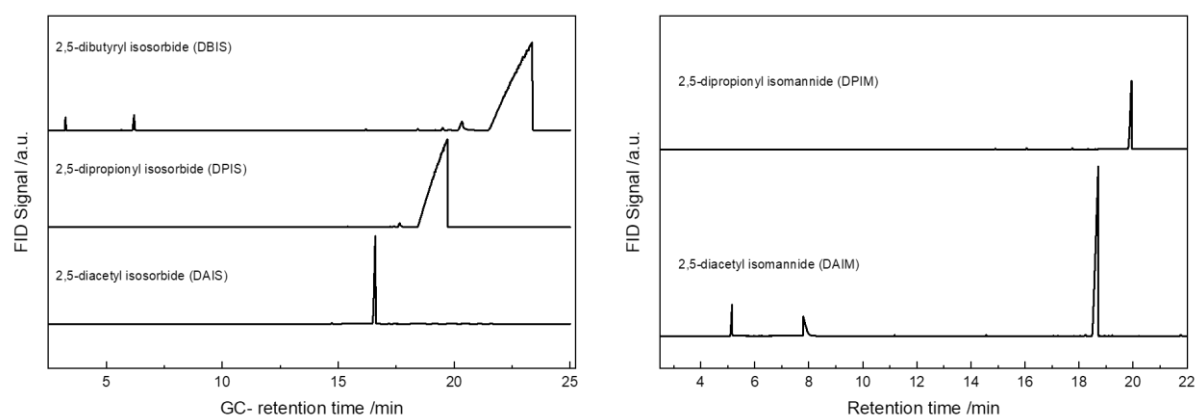

Fig. S9 Gas chromatograms of the purified dianhydrohexitol esters

## OpenLCA data

**Tab. S1** Elementary or process flows of chemicals and energy quantities for the production of 1000 kg DAIS; implemented processes are based on literature data; ecoinvent based product and elementary flows already contain the pre-processes from cradle-to-gate; output elementary flows are emissions which leave the product system under study and cause emissions and accordingly environmental impacts

| Elementary or process flow                                                                         | Quantity for the production of 1t DAIS      | Data source /Ecoinvent flows and processes used as input and output data for the openLCA impact assessment                                                              |
|----------------------------------------------------------------------------------------------------|---------------------------------------------|-------------------------------------------------------------------------------------------------------------------------------------------------------------------------|
| <b>Inputs Route 1</b>                                                                              |                                             |                                                                                                                                                                         |
| Isosorbide                                                                                         | 648.5kg                                     | Implemented process based on literature data [1-4]                                                                                                                      |
| Glucose                                                                                            | 1024.00 kg                                  | Manufacture of starches and starch products: glucose production   glucose   Cutoff, U - GLO                                                                             |
| Hydrogen, liquid                                                                                   | 11.41 kg                                    | Manufacture of basic chemicals: market for hydrogen, liquid   hydrogen, liquid   Cutoff, U - RER                                                                        |
| Water, deionised                                                                                   | 1530.61 kg                                  | Water collection, treatment and supply: market for water, deionised   water, deionised   Cutoff, U - Europe without Switzerland                                         |
| Energy for the catalytic hydrogenation of glucose to sorbitol                                      | 9776.26 kWh                                 | Electric power generation, transmission and electricity voltage: transformation from high to medium voltage   electricity, medium voltage   Cutoff, U - FR              |
| Energy for the dehydration of sorbitol to isosorbide                                               | 6607.19 kWh                                 | Electric power generation, transmission and electricity voltage: transformation from high to medium voltage   electricity, medium voltage   Cutoff, U - FR              |
| Energy and heat for the crystallisation of isosorbide                                              | 1027.36 kWh                                 | Electric power generation, transmission and electricity voltage: transformation from high to medium voltage   electricity, medium voltage   Cutoff, U - FR              |
| Cooling water                                                                                      | 40.53 m <sup>3</sup>                        | Water collection, treatment and supply: market for water, deionised   water, deionised   Cutoff, U - Europe without Switzerland                                         |
| Acetic acid                                                                                        | 1199.74 kg                                  | Manufacture of basic chemicals: market for acetic acid, without water, in 98 % solution state   acetic acid, without water, in 98 % solution state   Cutoff, U - GLO    |
| Amberlyst-15 (wet)                                                                                 | 31.74 kg                                    | Implemented process based on literature data [5]                                                                                                                        |
| Styrene                                                                                            | 23.15 kg                                    | Manufacture of plastics and synthetic rubber in primary forms: market for styrene   styrene   Cutoff, U - GLO                                                           |
| Divinylbenzene, produced from styrene and ethylene                                                 | 3.50 kg                                     | Implemented process based on literature data [6]                                                                                                                        |
| water, deionised                                                                                   | 37.45 kg                                    | Water collection, treatment and supply: market for water, deionised   water, deionised   Cutoff, U - Europe without Switzerland                                         |
| Energy: polymerisation and functionalisation                                                       | 122.51 kWh                                  | Electric power generation, transmission and distribution: electricity voltage transformation from high to medium voltage   electricity, medium voltage   Cutoff, U - DE |
| sulfuric acid                                                                                      | 3.41 kg                                     | Manufacture of basic precious and other non-ferrous metals: market for sulfuric acid   sulfuric acid   Cutoff, U - RER                                                  |
| carboxymethyl cellulose, powder                                                                    | 3.02 kg                                     | Manufacture of basic chemicals: carboxymethyl cellulose production, powder   carboxymethyl cellulose, powder   Cutoff, U - RER                                          |
| Entrainer:<br>Toluene, liquid                                                                      | Start: 2209.43 kg<br>(recycle: 2099.50 kg)  | Manufacture of basic chemicals: market for toluene, liquid   toluene, liquid   Cutoff, U – RER                                                                          |
| n-propylacetate                                                                                    | Start: 2260.00 kg<br>(recycle: 2147.00 kg)  | Implemented process based on literature data [7]                                                                                                                        |
| Energy for chemicals production (pre-processes), for esterification [5], for DAIS purification [5] | 20020.32 kWh<br>10573.58 kWh<br>3873.64 kWh | Electric power generation, transmission and distribution: electricity voltage transformation from high to medium voltage   electricity, medium voltage   Cutoff, U - DE |
| <b>Outputs Route 1</b>                                                                             |                                             |                                                                                                                                                                         |
| Diacetyl isosorbide (DAIS)                                                                         | 1000.0 kg                                   | set output                                                                                                                                                              |
| Acetic acid                                                                                        | 62.8 kg                                     | Elementary Flow: Emission to water/fresh water                                                                                                                          |

|                                                                                                    |                                            |                                                                                                                                    |
|----------------------------------------------------------------------------------------------------|--------------------------------------------|------------------------------------------------------------------------------------------------------------------------------------|
| Entrainer:<br>Toluene                                                                              | 110.5 kg                                   | Elementary Flow: Emission to water/fresh water                                                                                     |
| n-Propylacetate                                                                                    | 113.0 kg                                   | Elementary Flow: Emission to water/unspecified                                                                                     |
| Waste water (from esterification)                                                                  | 156.52 kg                                  | Elementary Flow: Emission to water/fresh water                                                                                     |
| <i>Amberlyst-15 (wet and waste)</i>                                                                |                                            |                                                                                                                                    |
| Polystyrene waste                                                                                  | 31.74 kg                                   | Elementary Flow: Waste/unspecified                                                                                                 |
| Waste water from Amberlyst production, purification, functionalisation                             | 2568.0 kg                                  | Elementary Flow: Emission to water/fresh water                                                                                     |
| Waste water from isosorbide production from glucose                                                | 74940.0 kg                                 | Elementary Flow: Emission to water/fresh water                                                                                     |
| <b>Inputs Route 2</b>                                                                              |                                            |                                                                                                                                    |
| Isosorbide                                                                                         | 634.78 kg                                  | Implemented process based on literature data [1-4]                                                                                 |
| Acetic anhydride                                                                                   | 804.8 kg<br>(recycle 566.2 kg)             | acetic anhydride production, ketene route   acetic anhydride   Cutoff, U - RER                                                     |
| Water for hydrolysis                                                                               | 10.5 kg                                    | Water collection, treatment and supply: market for water, deionised   water, deionised   Cutoff, U - Europe without Switzerland    |
| Energy for chemicals production (pre-processes), for esterification [5], for DAIS purification [5] | 31927.67 kWh<br>1162.08 kWh<br>3960.66 kWh | electricity voltage transformation from high to medium voltage   electricity, medium voltage   Cutoff, U - DE                      |
| <b>Outputs Route 2</b>                                                                             |                                            |                                                                                                                                    |
| Diacetyl isosorbide                                                                                | 1000.0 kg                                  | set output                                                                                                                         |
| Acetic acid                                                                                        | 269.33 kg                                  | Elementary Flow: Emission to water/fresh water                                                                                     |
| <b>Inputs Reference Route</b>                                                                      |                                            |                                                                                                                                    |
| Isosorbide                                                                                         | 634.78 kg                                  | Implemented process based on literature data [1-4]                                                                                 |
| Acetic acid                                                                                        | 1199.74 kg                                 | market for acetic acid, without water, in 98% solution state   acetic acid, without water, in 98% solution state   Cutoff, U - GLO |
| Sodium bicarbonate (NaHCO <sub>3</sub> )                                                           | 950.29 kg                                  | market for sodium bicarbonate   sodium bicarbonate   Cutoff, U - GLO                                                               |
| Sulfuric acid                                                                                      | 1.27 kg                                    | market for sulfuric acid   sulfuric acid   Cutoff, U - RER                                                                         |
| Toluene                                                                                            | 2209.04 kg<br>(recycle 2099.5 kg)          | Manufacture of basic chemicals: market for toluene, liquid   toluene, liquid   Cutoff, U - RER                                     |
| Energy for chemicals production (pre-processes), for esterification [5], for DAIS purification [5] | 28479.14 kWh<br>9163.77 kWh<br>3874.22 kWh | electricity voltage transformation from high to medium voltage   electricity, medium voltage   Cutoff, U - DE                      |
| <b>Outputs Reference Route</b>                                                                     |                                            |                                                                                                                                    |
| Diacetyl isosorbide                                                                                | 1000.0 kg                                  | set output                                                                                                                         |
| Acetic acid                                                                                        | 678.0 kg                                   | Elementary Flow: Emission to water/fresh water                                                                                     |
| Toluene                                                                                            | 110.5 kg                                   | Elementary Flow: Emission to water/fresh water                                                                                     |
| Waste water (containing neutralized sulfuric acid)                                                 | 11456.5 kg                                 | Elementary Flow: Emission to water/fresh water                                                                                     |
| Sodium sulfate                                                                                     | 1.27 kg                                    | Elementary Flow: Resource/unspecified                                                                                              |

## References

- [1] B. A. Rugg, W. Brenner, U.S. Patent No. 4,316,747, 1982.
- [2] C. Dussenne, T. Delaunay, V. Wiatz, H. Wyart, I. Suisse, M. Sauthier, Green Chemistry, 2007, 19, 5332.
- [3] J. C. Chao, D. T. Huibers U.S. Patent No. 4322569, 1982.
- [4] D. Schreck, M. Bradford, N. Clinton, P. Arbury, Patent No. WO2009126852, 2009.
- [5] P. Akkaramongkolporn, T. Ngawhirunpat, P. Opanasopit, AAPS PharmSciTech, 2009, 10, 641.
- [6] Ecoinvent database 3.7.1 "styrene production | styrene | Cutoff, U - RER".
- [7] Ecoinvent database 3.7.1 "propyl acetate production | isopropyl acetate | Cutoff, U - RER".
- [8] T. Fleiter, B. Schломann, W. Eichhammer, Fraunhofer-Verlag Stuttgart, 2013.
